# Supplementary material
Source: PubMed Central journal article supplement (PMC3859186)
Supplement: NIHMS531329-supplement-01.pdf [file NIHMS531329-supplement-01.pdf]

## Supplementary data

### Understanding specificity of the mycosin proteases in ESX/type VII secretion by structural and functional analysis

Jonathan W. Wagner<sup>1</sup>, Timothy J. Evans<sup>1</sup>, Jing Chen<sup>1</sup>, Haining Zhu<sup>1</sup>, Edith N. G. Houben<sup>2</sup>, Wilbert Bitter<sup>2</sup> and Konstantin V. Korotkov<sup>1\*</sup>

<sup>1</sup>Department of Molecular & Cellular Biochemistry and Center for Structural Biology, University of Kentucky, Lexington, Kentucky 40536, USA

<sup>2</sup>Department of Medical Microbiology and Infection Control, VU University Medical Center, Amsterdam, The Netherlands

\*Correspondence to: Konstantin V. Korotkov, Department of Molecular & Cellular Biochemistry, University of Kentucky, 741 South Limestone, Lexington, KY 40536, USA.  
Phone: 859-323-5493. Fax: 859-323-5504. E-mail: [kkorotkov@uky.edu](mailto:kkorotkov@uky.edu)

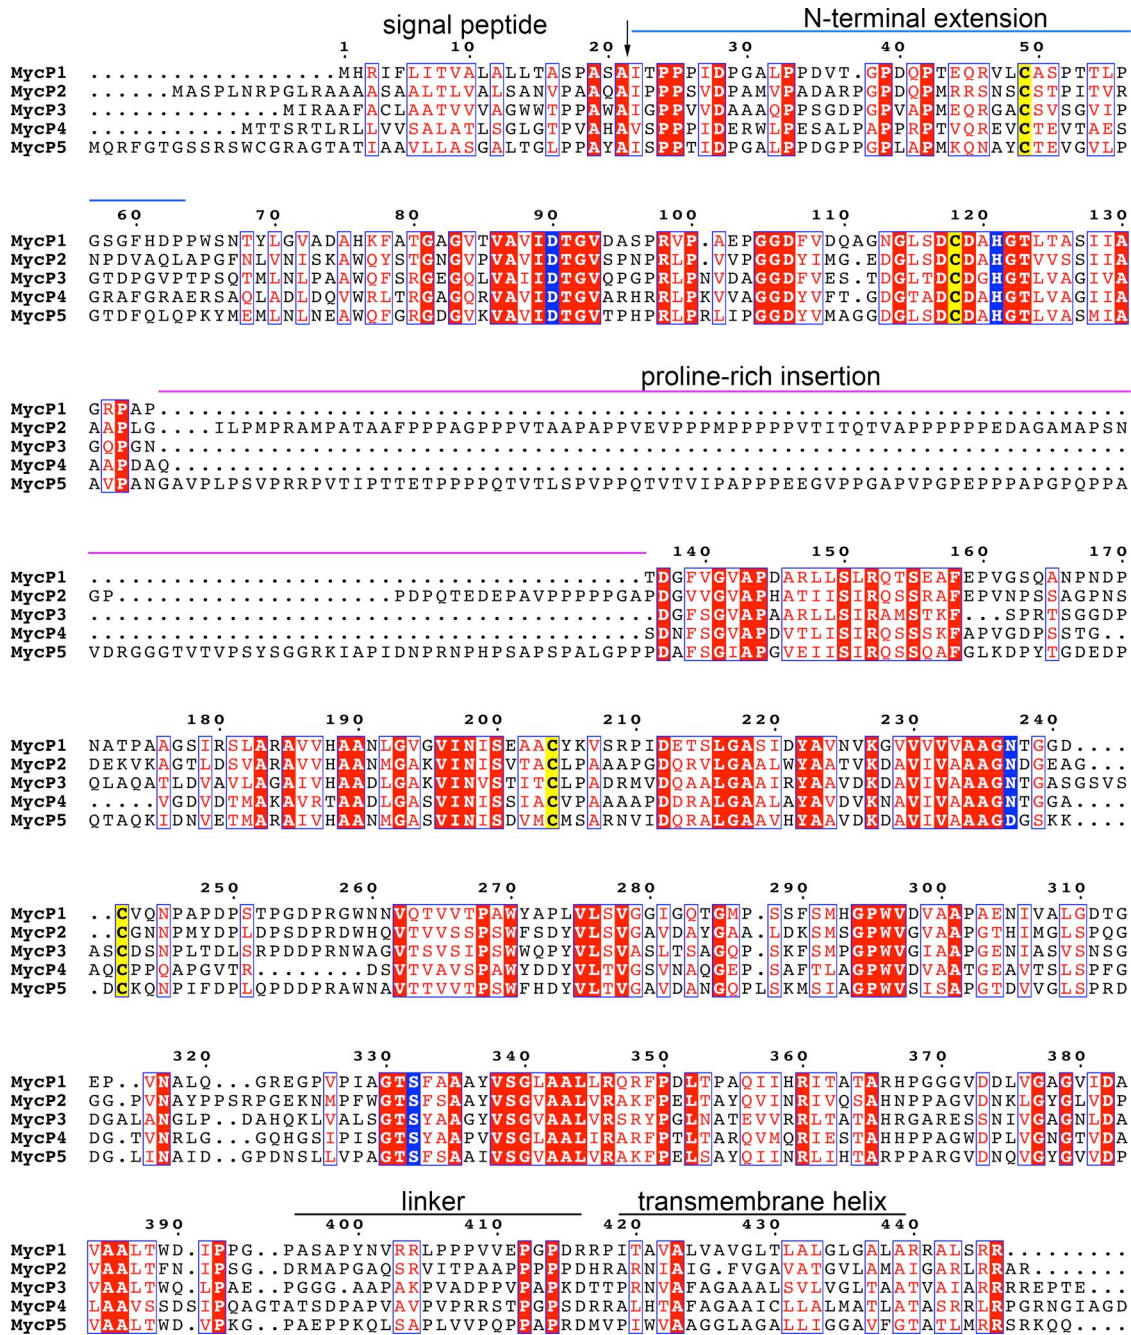

**Fig. S1.** Sequence alignment of *M. tuberculosis* mycosin proteases.

The N-terminal extension is indicated by blue line. The proline-rich insertion, which is present in MycP<sub>2</sub> and MycP<sub>5</sub>, is indicated by magenta line. The conserved Cys residues are highlighted in yellow. The catalytic triad residues, as well as the residues coordinating the oxyanion hole, are highlighted in blue. Note that Asp367 is the residue coordinating the oxyanion hole in MycP<sub>5</sub>.

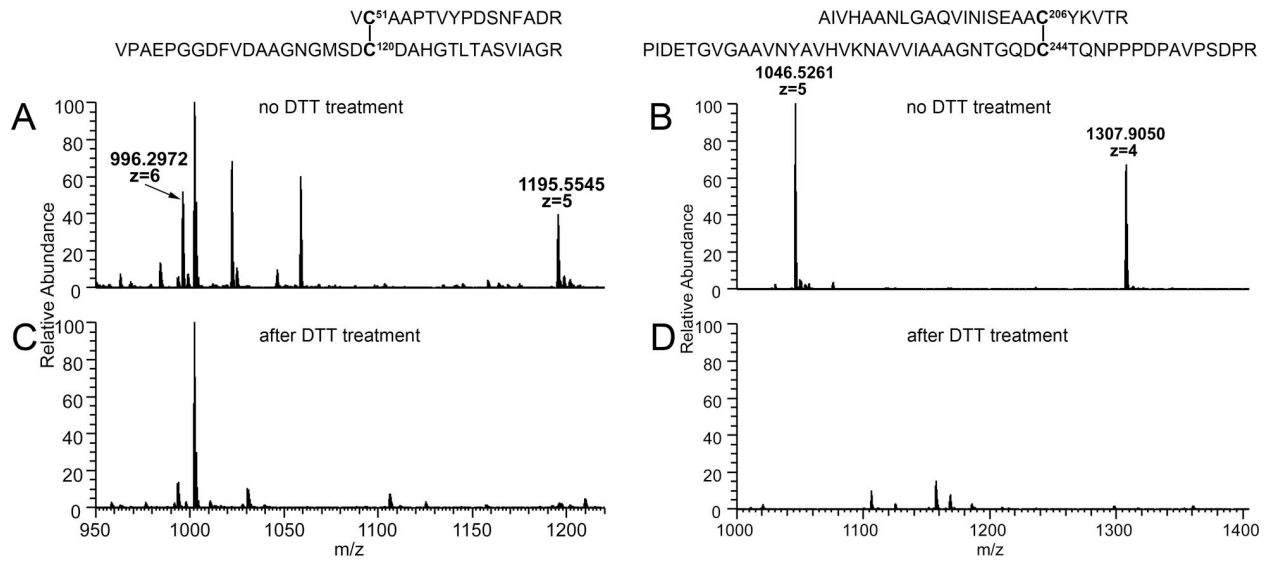

**Fig. S2.** Mass spectrometry analysis of the disulfide-linked peptides from MycP<sub>1mth</sub>.

A and B. MycP<sub>1mth</sub> sample was not pretreated with dithiothreitol (DTT) and iodoacetamide (IAA) prior to trypsin digestion.

C and D. MycP<sub>1mth</sub> sample was pretreated with DTT and IAA prior to trypsin digestion.

The peaks labeled in (A) are the 6+ and 5+ ions of the disulfide-linked peptides: VC<sup>51</sup>AAPTVPDSNFADR–VPAEPGGDFVDAAGNGMSDC<sup>120</sup>DAHGTLTASVIAGR. The peaks

labeled in (B) are the 5+ and 4+ ions of the disulfide-linked peptides:

AIVHAANLGAQVINISEAAC<sup>206</sup>YKVTR–

PIDETGVGAAVNYAVHVKNNAVIAAAGNTGQDC<sup>244</sup>TQNPPDPAPVPSDPR. These peaks disappeared in the corresponding LC-MS analysis of the tryptic digestion samples with DTT pretreatment (C and D).

>MycP1  
***MQAGL**TRACQSFTAAERERSDSGVHRTLLTMVALALLTAPPALAI**DP**PSIDPGAVPPDVTGPD**Q**PT**EQ**RVLCTSP**TT**LPDS  
**SF**HDPWNSNAYMGVGE**AHK**FATGAGVTVAVIDTGVDASPRVPAEPGGDFVDQAGDGLSDCDAHGTLTASIIIGGRPAPT**DG**  
**FV**GVADPVRLLSLRQTSE**A**FEFVGSQPNPNPNATPAAGS**IR**SLAR**AV**VHAANLGAGVINISEAAC**Y**KVSRPIDEISLGA  
**AI**DYAVNAKNV**V**VVAAAGNTGGDCSQNPMPDASTPNDRGW**N**KVQTVVTPAWYAPLVLTVGGIGQNGV**P**SSFSMHGPWVG  
VAAPAENI**I**ALGDHGEFVNALQGR**E**GPVPIAGTS**F**AAAYV**S**GLAALV**R**QRFPELTPVQ**VM**NRITATARHPGGGIDNLVGA  
GVVNAVAAL**T**WDIPPGPASVPPSV**R**RLPP**P**RIE**P**GDHRPITMVAVSVLGLTLVLGLGLTLAAR**LR**RR*

>MycP3  
***M**KRAGSACLTAILAI**F**TTGALWAAPPVSAI**S**PPAVDD**S**VQPPSGT**P**GPVQ**T**ME**Q**R**G**ACSV**S**GLIP**G**TD**I**SV**P**ASQAMLN  
L**P**AAWQFSR**G**EGQLVA**I**LD**T**GVQ**P**PRLPNV**D**AGGDFVDSDGLTDCDGRGTLV**A**GIVAGQ**P**NGDFSGVAP**A**ARLLS**I**R  
V**T**SDKFSARSSGGDP**S**VERATIDVAALGRAIVHAAD**R**GARVINISSITCLPADRQVDQAALGAA**I**RYAAVDKDV**V**IVAAA  
GNSGAGGSGGGT**C**ESNPLTDLSHPDDPRNWAGVTSV**S**IPSLWQ**P**YVLSVASL**T**AGGQ**S**KFTMAGPWVG**I**AAPGENIVS  
VSNADGGGLANGLPNQ**R**Q**L**TPLSGTSYAAGYVSGVAALVRSKY**P**ELTAAQ**V**MHRLTATAHNGAR**D**PSNVV**G**AGILDPA**A**  
AL**T**WELPAADGGAPQ**V**APAKPVSVPPAPQ**P**RNTTPRN**V**AFAGAAALTVLVAGVAATVAIARR**R**KDAEG**R**TAREL*

>MycP5  
***M**Q**R**FGTVSGRL**R**PGRGSTATIAALLLASGALAGLPPAYAIN**P**PTIDLGALPPDG**T**PGPPAP**M**KQNSYCTEVGV**L**PG**T**DFK  
**L**Q**F**KY**M**EMLN**I**NEAWQ**F**GRGAGVKVAVIDTGVT**P**HP**R**FP**H**LIPGGDYVMGGDGLQDCDAHG**T**IVAS**M**IGAAPANGAL**P**PP  
AV**P**RR**P**VTIP**T**TEK**P**PP**P**Q**T**VLSPVPP**Q**TVTVIPG**P**PEEGAP**Q**GE**P**GP**G**VPP**P**AP**Q**PPASNHGGGT**V**IPSYSGGA  
R**V**TGVDHAGGPR**L**DP**P**PPAPDAFSGIAPEVELISIRQSSQAFGLKDPY**T**GDEDP**Q**TQ**Q**KIDDVETMARAI**V**HANMGAS  
V**I**NISDV**T**CMSAR**N**VIDQNALGA**A**VHYAAVDK**N**VVIVAAAGDGS**K**KDCKQ**N**PIFDPLQ**P**DDPR**D**WNA**V**TT**V**TP**S**WFSDY  
V**L**TVGAVDTNG**Q**PMT**K**MSIAGPWV**S**IAAPGT**D**VIGLSPRDDGLIN**A**IDGPD**N**SLLVPAGTS**F**ATA**I**VSGVVALV**R**AK**Y**PE  
**L**SAYQ**I**R**N**RLI**H**TAR**P**PARGVD**N**QVGYGVVD**P**VAAAL**T**WDV**P**EG**P**V**K**PK**Q**LSAP**L**EL**P**K**P**PA**E**RMV**P**VVVAAGGL**T**GAL  
LIGGAVFGTATLMRR**S**R**K**RR*

**Fig. S3.** Mycosin-derived peptides detected by MS/MS analysis.

Amino acid sequences of MycP<sub>1mm</sub>, MycP<sub>3mm</sub> and MycP<sub>5mm</sub>. Peptide sequences that were detected by MS/MS analysis are highlighted in grey. Potential trypsin digest sites are underlined. The signal sequences and N-terminal extensions are indicated in italic and bold fonts, respectively. The data were derived from: van der Woude *et al.* (2013) J. Bacteriol. 195, 2050-2059.

A

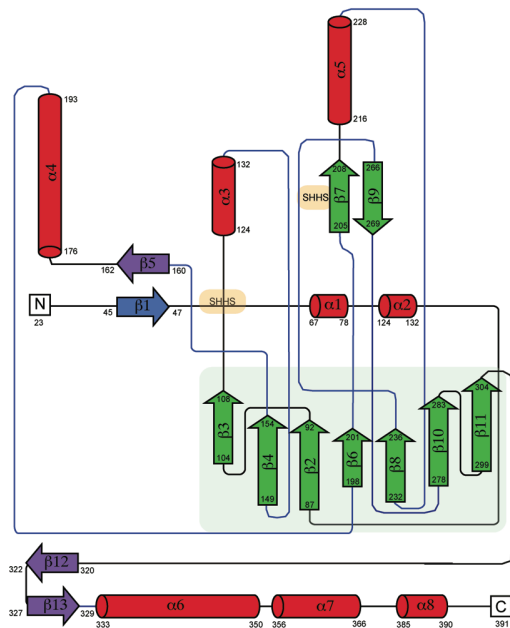

B

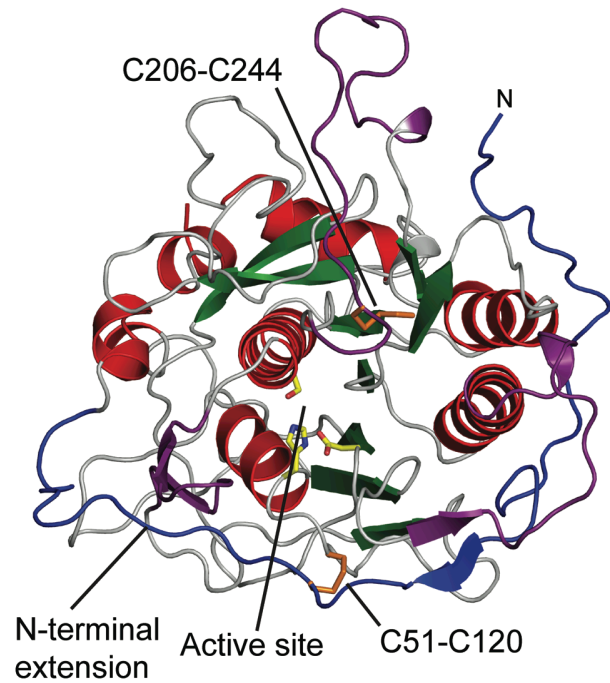

**Fig. S4.** Topology diagram of MycP<sub>1mth</sub>.

A. MycP<sub>1mth</sub> consists of a 7 stranded  $\beta$  sheet core (green) surrounded by 8  $\alpha$  helices (red). Three small anti-parallel  $\beta$  sheets are located surrounding the active site pocket. Two of these small  $\beta$  sheets include neighboring disulfide bonds (SHHS). Elements contributed by the N-terminal extension are colored blue. Elements contributed by insertion loops 1-3 are colored purple. Secondary structure diagram made with the help of the Pro-origami server (<http://munk.csse.unimelb.edu.au/pro-origami/>).

B. Cartoon of MycP<sub>1mth</sub> with secondary structure elements colored as in (A). The catalytic triad is shown as yellow sticks. Side chains of cysteine residues forming disulfide bonds are shown as orange sticks.

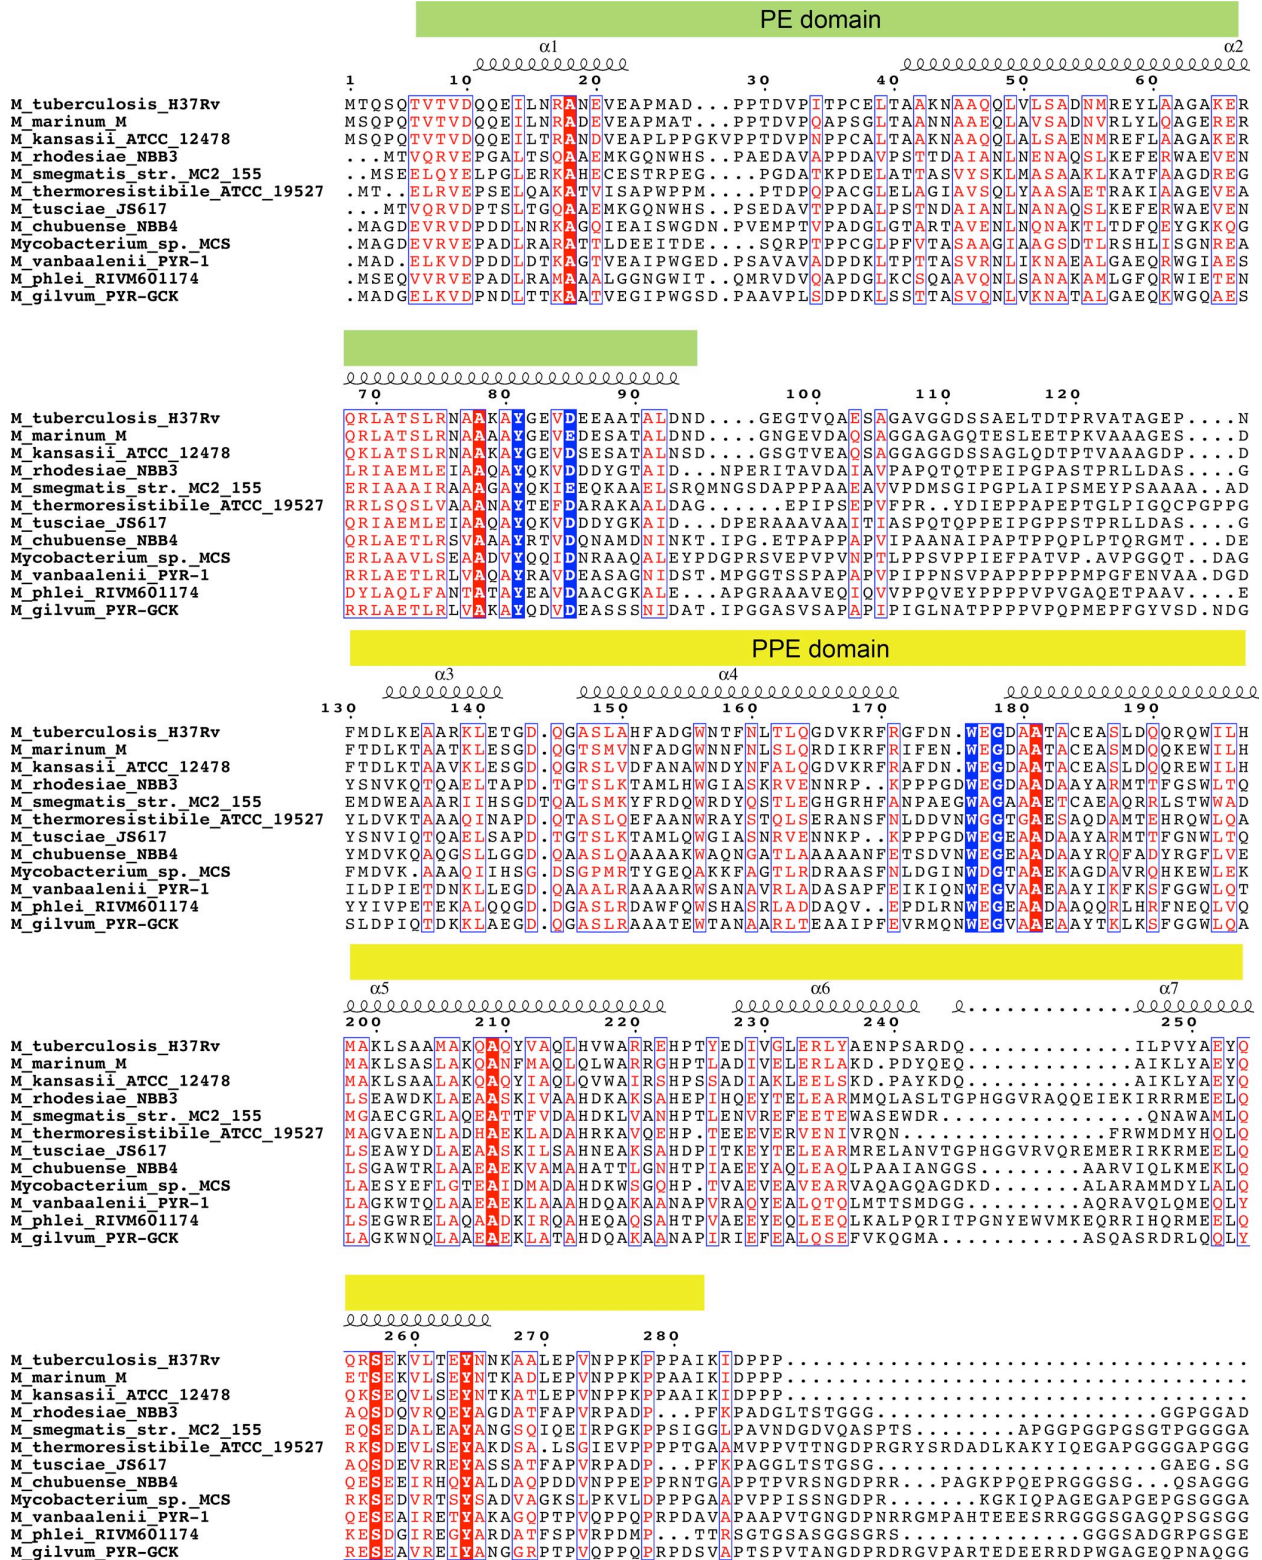

**Fig. S5.** Sequence alignment of EspB proteins (continues on the next page).

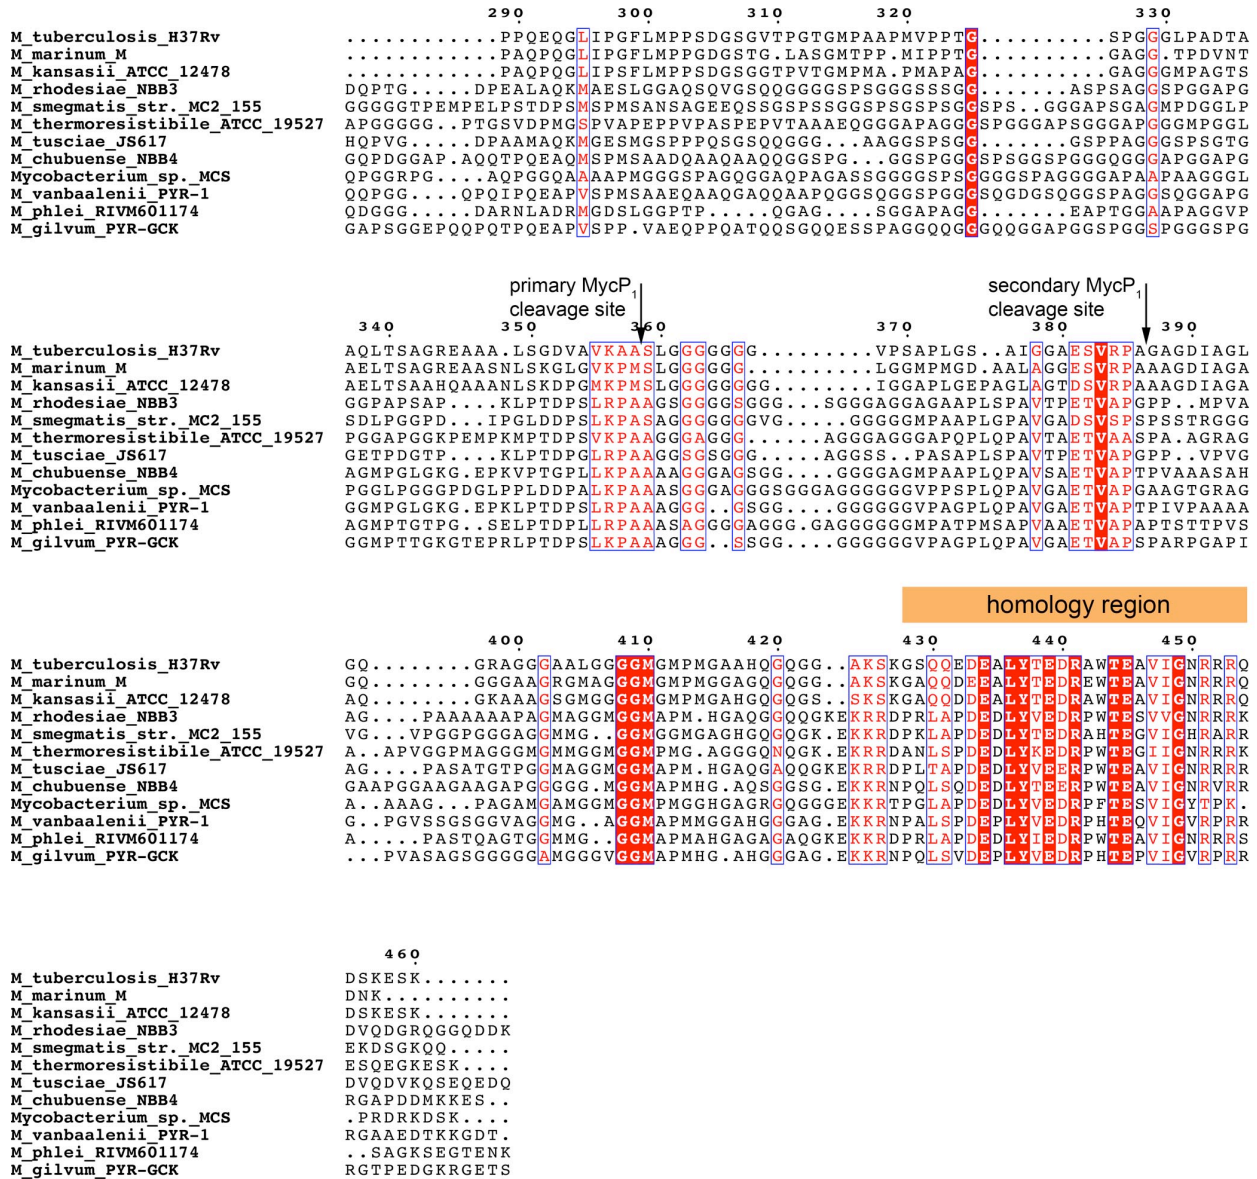

**Fig. S5.** Sequence alignment of EspB proteins.

The amino acid sequence alignment of EspB proteins from the ESX-1 clusters of mycobacteria was prepared using ClustalW2 (<http://www.ebi.ac.uk/Tools/msa/clustalw2/>). The PE and PPE domains, and the secondary structure elements are indicated as predicted by the HHpred server (<http://toolkit.tuebingen.mpg.de/hhpred>). The MycP<sub>1</sub> cleavage sites are indicated by vertical arrows. The YxxxD/E type VII (ESX) secretion motif in PE domain and the WxG motif in PPE domain are highlighted in blue. EspB proteins have a homology region of unknown function, indicated by orange rectangle.
